# Supplementary material for: Elucidation of the unsymmetrical effect on the piezoelectric and semiconducting properties of Cd-doped 1D-ZnO nanorods
Source: Royal Society of Chemistry journal article supplement (doi:10.1039/c6tc04592h), 2016-12-06
Supplement: c6tc04592h1.pdf [file c6tc04592h1.pdf]

## Supporting Information

### Elucidation of Unsymmetrical Effect on the Piezoelectric and Semiconducting Properties of Cd doped 1D-ZnO Nanorods

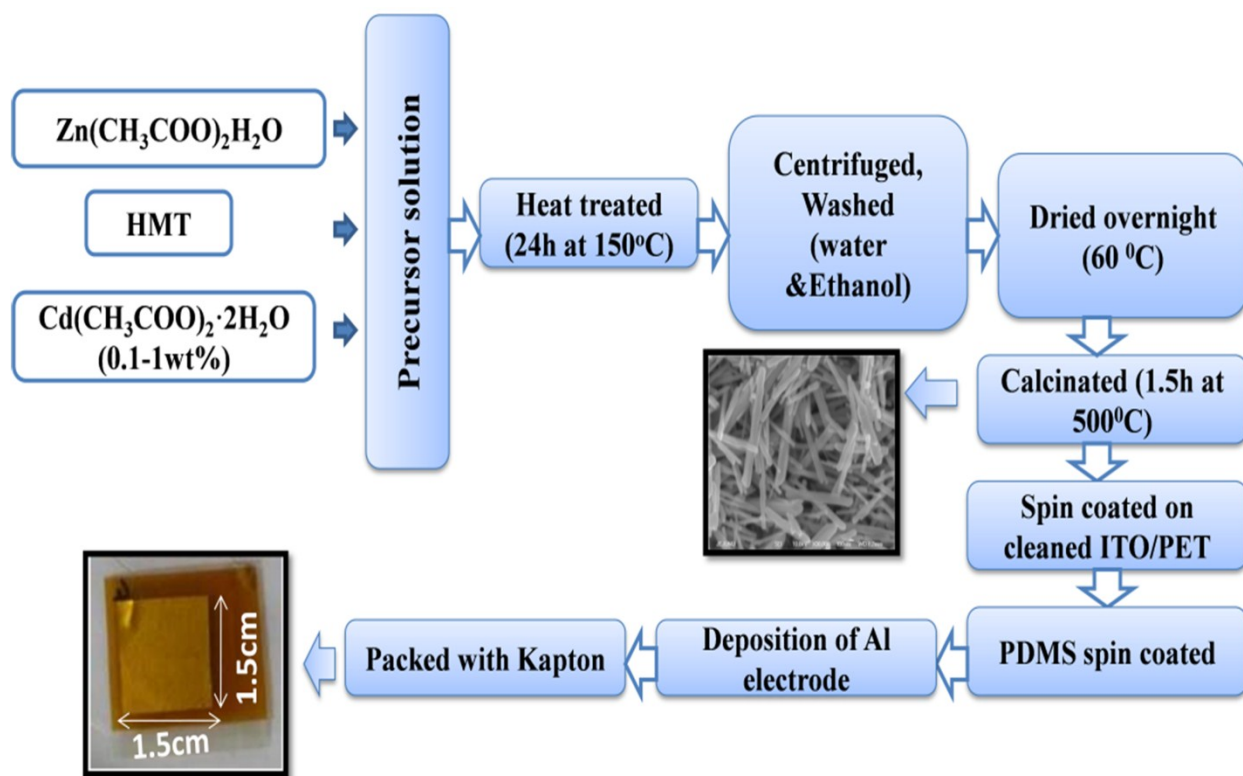

**Fig. S1** Schematic representation of fabrication process of P-NG devices

The wt% value of Cd is determined by the weight ratio between Cd and Zn precursors used for synthesis of ZnO NRs i.e.,  $\text{Cd}(\text{CH}_3\text{COO})_2 \cdot 2\text{H}_2\text{O} : [\text{Zn}(\text{CH}_3\text{COO})_2 \cdot 2\text{H}_2\text{O}]$ . In a typical procedure, the molar concentration of  $[\text{Zn}(\text{CH}_3\text{COO})_2 \cdot 2\text{H}_2\text{O}]$  is taken to be 0.2 M (0.878g) and the amount of

cadmium acetate dihydrate is varied as Cd/Zn = 0, 0.1, 0.5, 1, 1.5 and 2 wt%. Ex: For 1 wt% Cd doping, 0.00878 g of  $\text{Cd}(\text{CH}_3\text{COO})_2 \cdot 2\text{H}_2\text{O}$  is weighed i.e.,

$$\frac{\text{Cd}}{0.878\text{g}} = 1 \text{ wt}\%$$

Similarly, 0.00087g and 0.00439g of  $\text{Cd}(\text{CH}_3\text{COO})_2 \cdot 2\text{H}_2\text{O}$  is weighed for 0.1 wt% and 0.5 wt% of Cd doping.

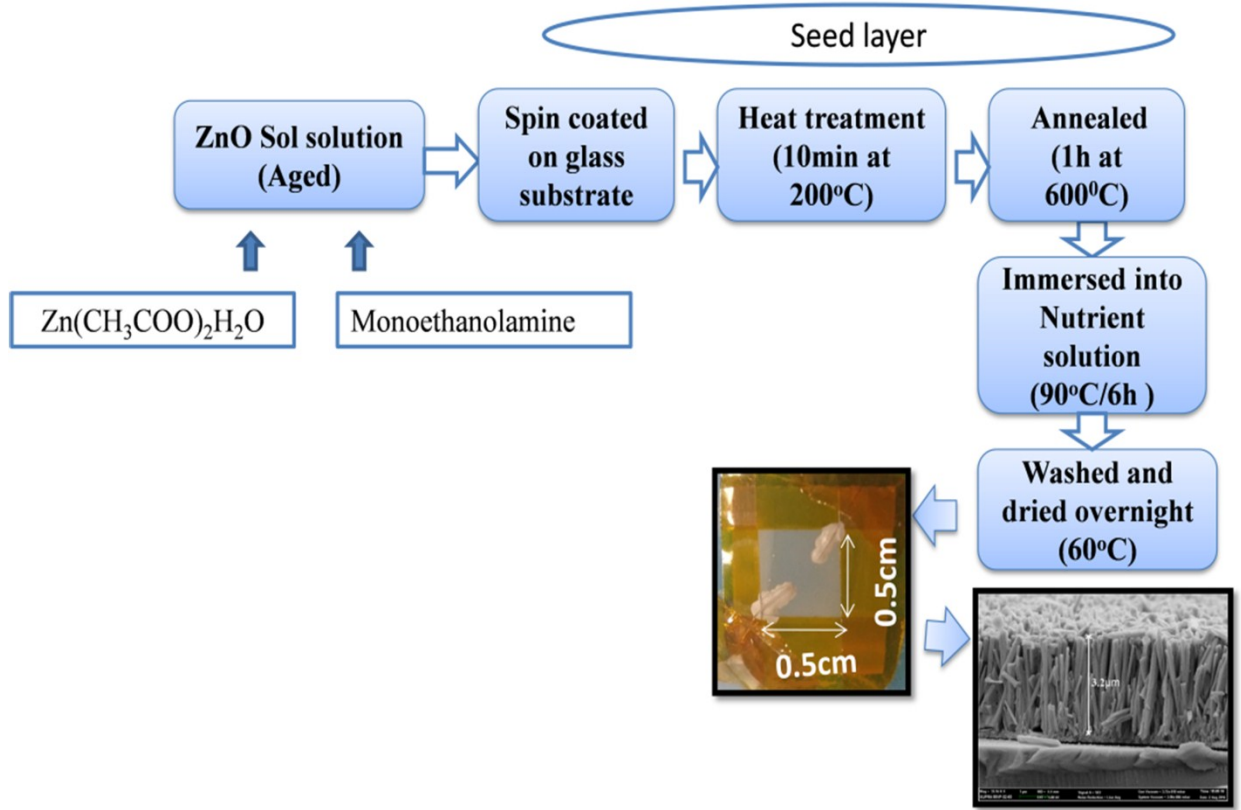

**Fig. S2** Experimental flow of UV-Sensor fabrication process

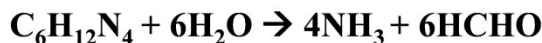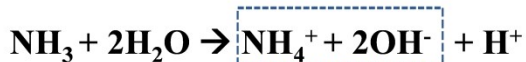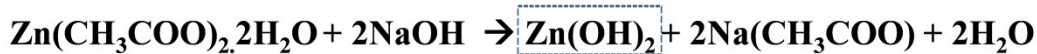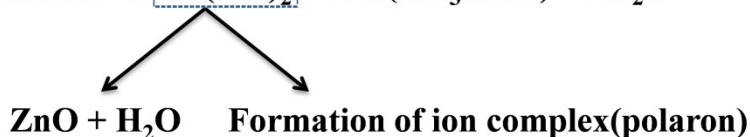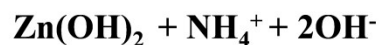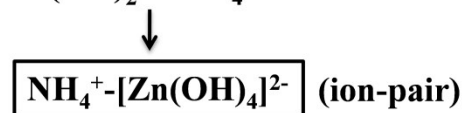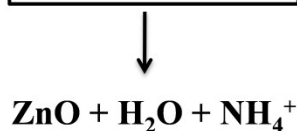

**Fig. S3** Growth mechanism of 1D-ZnO NRs

Fig: S3 illustrates the growth mechanism of ZnO NRs formation. The precursor dissolved in aqueous medium forms  $\text{Zn}(\text{OH})_2$  which undergoes two types of reaction i) it reduces to a smaller extent forming ZnO that acts as a nucleation site ii) it forms an ion-complex  $[\text{Zn}(\text{OH})_2]^-$  which reacts with HMT to form ion-pair complex or polaron ( $\text{NH}_4^+ - [\text{Zn}(\text{OH})_4]^{2-}$ ) due to electrostatic interaction. The presence of  $\text{NH}_4^+$  leads to rod shape morphology by orienting the polaron on c-axis of ZnO crystal. Thus HMT acts as a surfactant by regulating the growth direction of ZnO. Sodium acetate is formed as a by-product during the reaction between Zinc acetate dihydrate and  $\text{NaOH}$ <sup>1</sup>. Sodium acetate formed is water soluble and therefore it gets removed during the centrifugation and heat treatment (Please refer experimental section). Thus the final end product formed (ZnO NRs) are pure with no impurities or by-products residing in it.

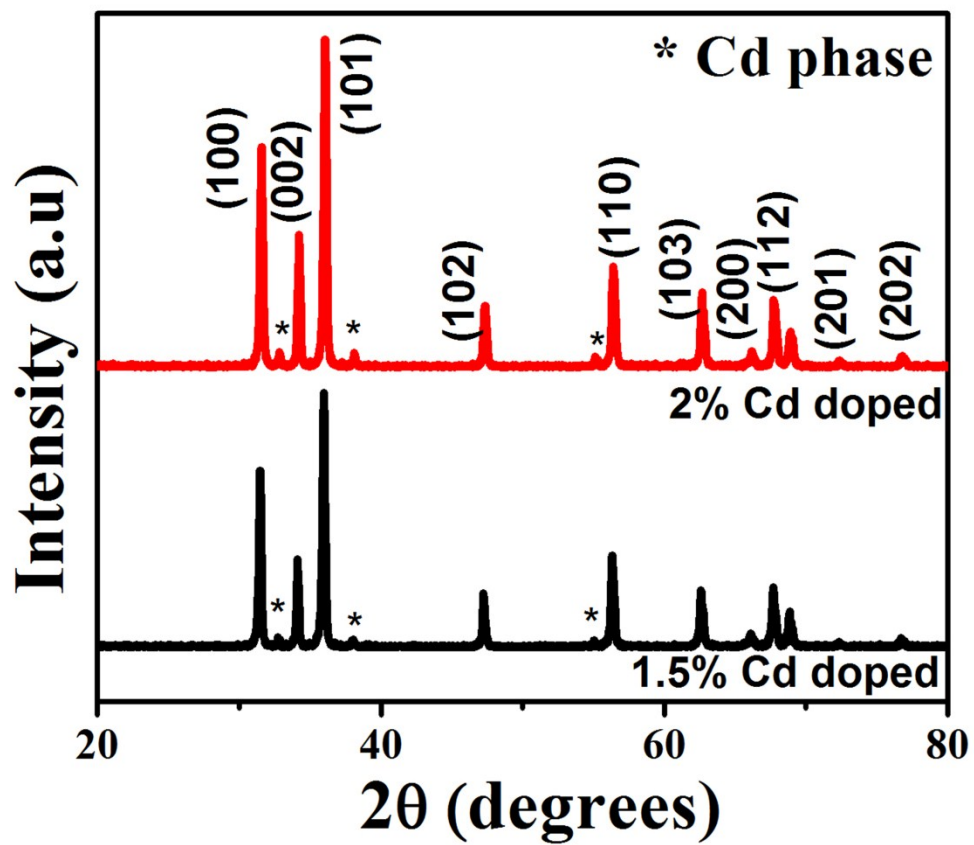

**Fig. S4** XRD patterns of 1.5 wt % and 2 wt % Cd doped ZnO NRs

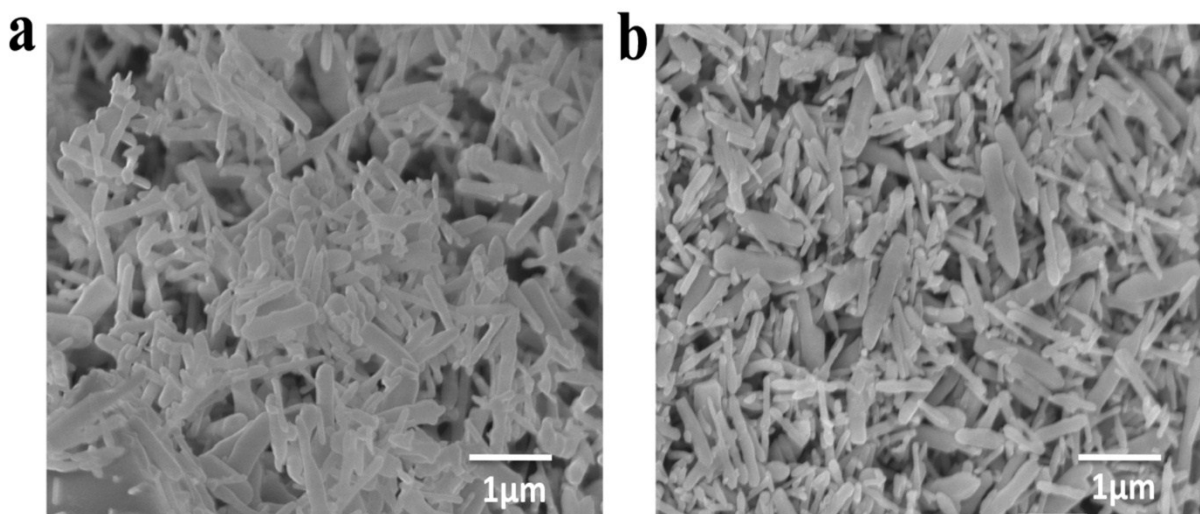

**Fig. S5** FESEM images showing the deterioration in ZnO NRs when doped with higher Cd concentration **(a)** 1.5 wt % and **(b)** 2 wt %

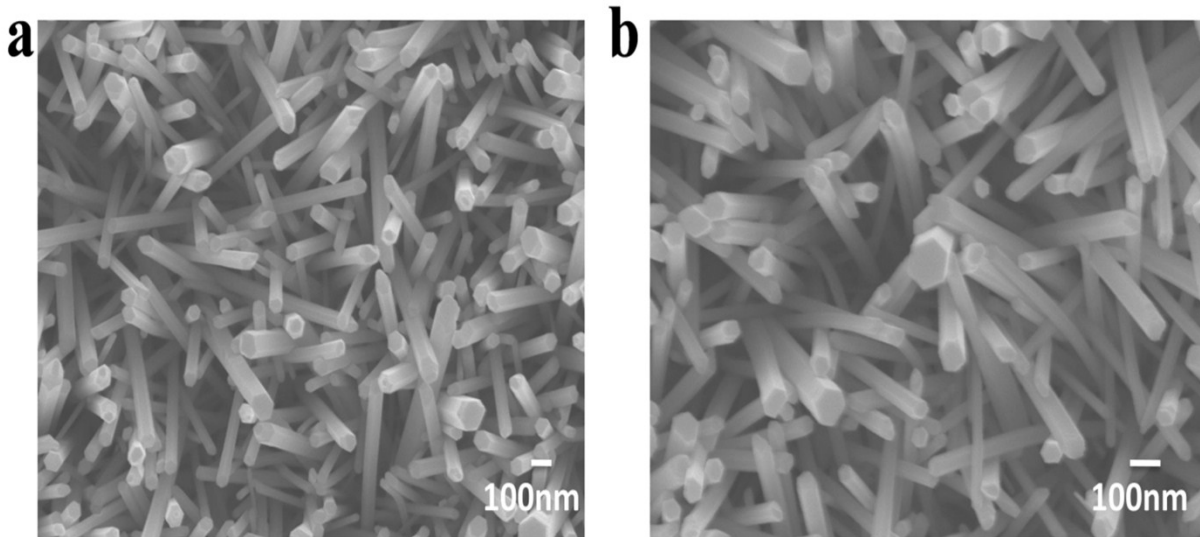

**Fig. S6** Top view of FESEM images of vertically grown **(a)** ZnO NRs and **(b)** 1 wt % Cd-ZnO NRs on glass substrate

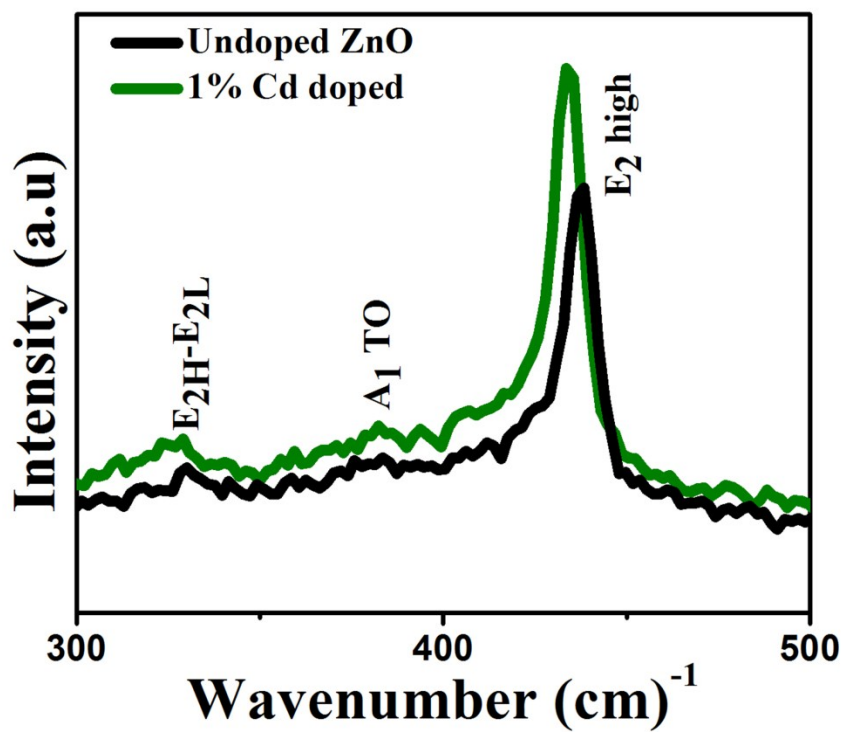

**Fig: S7.** Raman spectra of undoped and 1 wt% Cd-doped ZnO NRs grown vertically on glass substrate

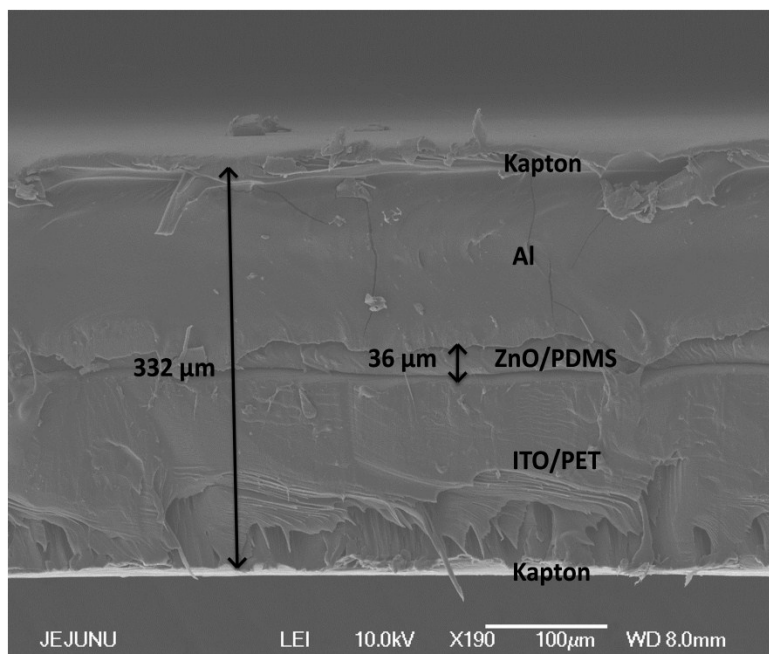

**Fig. S8** Cross-sectional FESEM analysis of fabricated PNG device

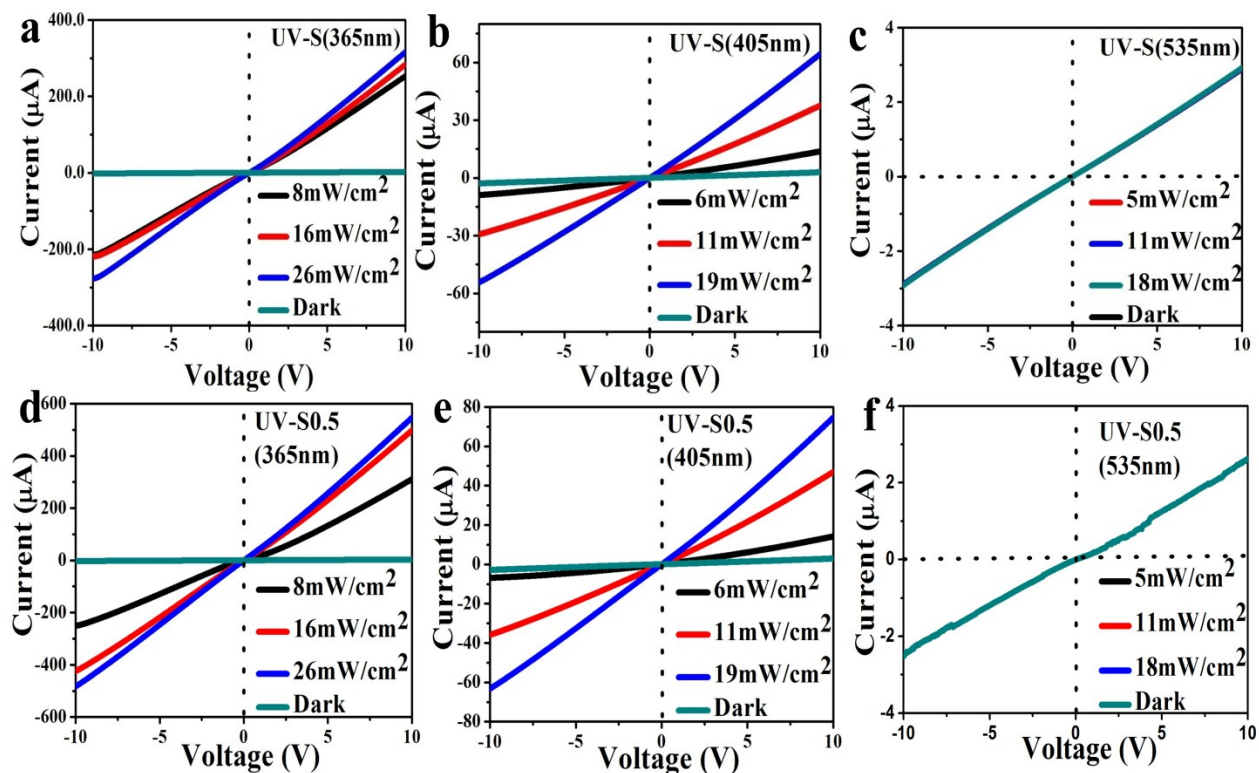

**Fig. S9** I-V measurements at various wavelengths and illumination intensities. Undoped ZnO NRs (a) 365 nm, (b) 405 nm (c) 535 nm and 0.5 wt% Cd-doped ZnO NRs (d) 365 nm, (e) 405 nm and (f) 535 nm.

**Table: S1** Comparison of the Proposed UV-Sensor Device Performance with Other reports

| <b>Material</b> | <b>V<sup>a</sup></b> | <b>I<sub>ph</sub><sup>b</sup></b> | <b><math>\tau_{Rc}</math></b> | <b><math>\tau_{Dd}</math></b> | <b>R<sub><math>\lambda</math></sub><sup>e</sup></b> | <b>Ref</b> |
|-----------------|----------------------|-----------------------------------|-------------------------------|-------------------------------|-----------------------------------------------------|------------|
|                 | <b>(V)</b>           | <b>(A)</b>                        | <b>(s)</b>                    | <b>(s)</b>                    | <b>(A/W)</b>                                        |            |
| ZnO:Mn          | 5                    | 0.2 m                             | 2.75                          | 16.8                          | 0.065                                               | 2          |
| ZnO:Ti          | 5                    | 102 $\mu$                         | -                             | 135                           | 0.05                                                | 3          |
| ZnO:Fe          | 8                    | 1.13 m                            | -                             | -                             | 3.66                                                | 4          |
| ZnO:Sb          | 3                    | 28.3 $\mu$                        | 7.3                           | 20.3                          | -                                                   | 5          |
| ZnO:Mg          | 5                    | 44.6 $\mu$                        | -                             | -                             | 22.33m                                              | 6          |
| ZnO:Co          | 5                    | 14 $\mu$                          | -                             | -                             | 0.0033                                              | 7          |
| ZnO:Ag          | 5                    | 40 m                              | 80m                           | 3.27                          | -                                                   | 8          |
| ZnO:C           | 14                   | -                                 | 2.97n                         | 2.97n                         | 1.7x10 <sup>6</sup>                                 | 9          |
| ZnO:GO          | 10                   | 1 $\mu$                           | 69                            | 56                            | -                                                   | 10         |
| ZnO:Cd          | 10                   | 330 $\mu$                         | 8                             | 10                            | 164m                                                | This work  |

<sup>a</sup>Bias Voltage , <sup>b</sup> Photocurrent , <sup>c</sup>Response time, <sup>d</sup> Recovery time, <sup>e</sup>Photoresponsivity.



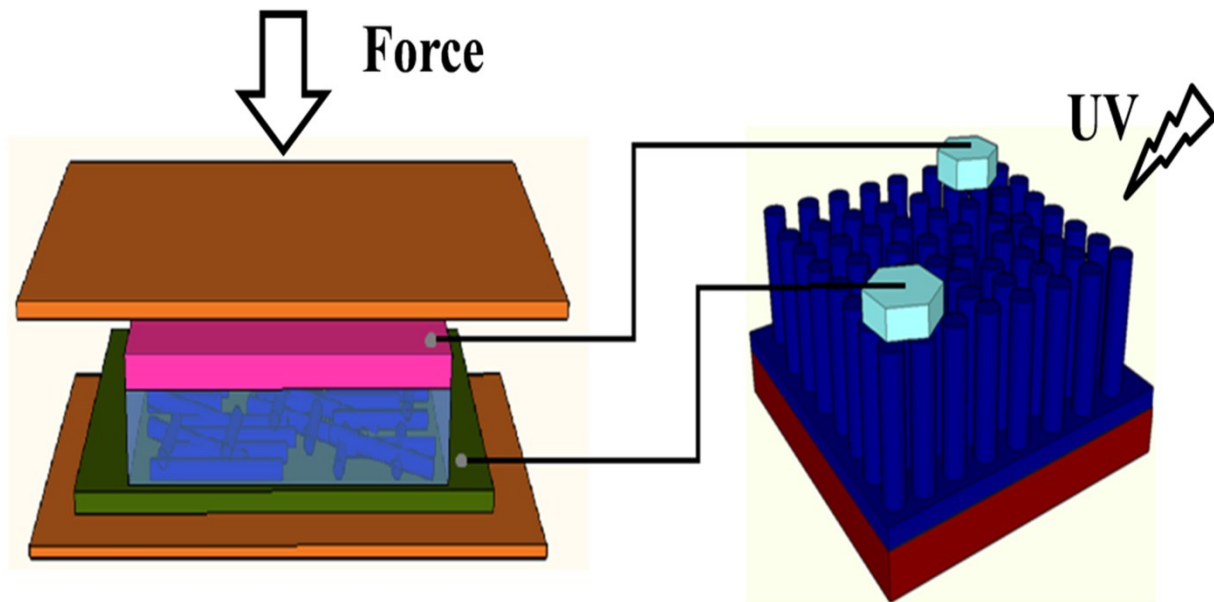

**Fig. S10** Schematic of SPUV-S by parallel connections between P-NG and UV-S

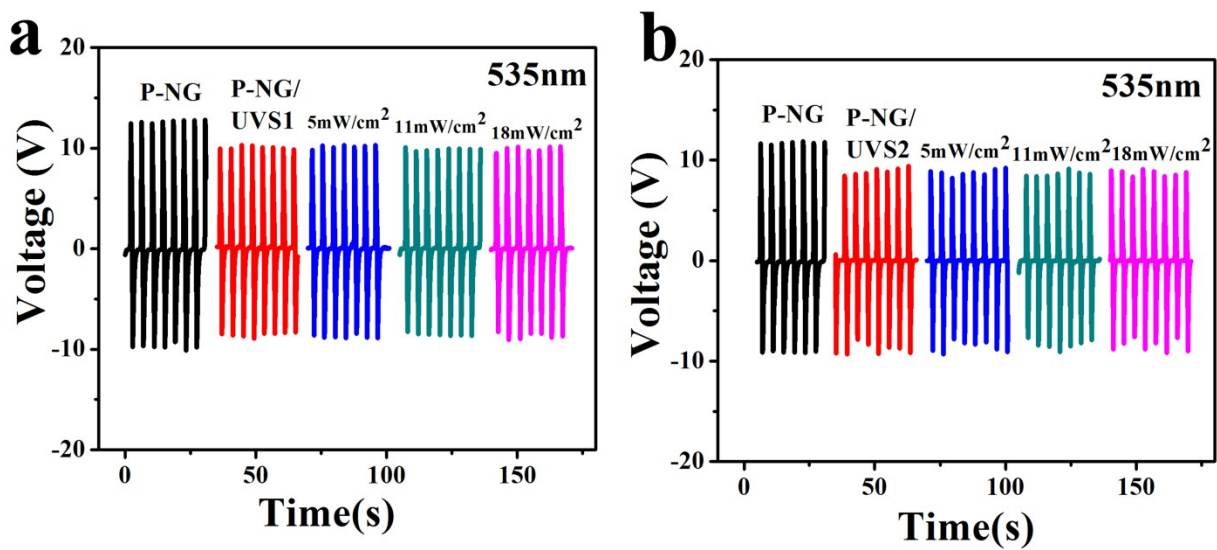

**Fig. S11** Performance of self-powered UV-photo sensor (UV-S and UV-S1) at a wavelength of 535 nm

## References:

- 1 J. N. Hasnidawani, H. N. Azlina, H. Norita, N. N. Bonnia, S. Ratim and E. S. Ali, *Procedia Chem.*, 2016, **19**, 211–216.
- 2 C. O. Chey, X. Liu, H. Alnoor, O. Nur and M. Willander, *Phys. Status Solidi - Rapid Res. Lett.*, 2015, **9**, 87–91.
- 3 P. S. Shewale, N. K. Lee, S. H. Lee, K. Y. Kang and Y. S. Yu, *J. Alloys Compd.*, 2015, **624**, 251–257.
- 4 R. Azimirad, A. Khayatian, S. Safa and M. Almasi Kashi, *J. Alloys Compd.*, 2014, **615**, 227–233.
- 5 W. Dai, X. Pan, S. Chen, C. Chen, W. Chen, H. Zhang and Z. Ye, *RSC Adv.*, 2015, **5**, 6311–6314.
- 6 P. S. Shewale and Y. S. Yu, *J. Alloys Compd.*, 2016, **654**, 79–86.
- 7 H. S. Al-Salman and M. J. Abdullah, *J. Mater. Sci. Technol.*, 2013, **29**, 1139–1145.
- 8 Y. Liu, X. Zhang, J. Su, H. Li, Q. Zhang and Y. Gao, *Opt. Express*, 2014, **22**, 30148–55.
- 9 D.-Y. Guo, C.-X. Shan, S.-N. Qu and D.-Z. Shen, *Sci. Rep.*, 2014, **4**, 7469.
- 10 Z. Wang, X. Zhan, Y. Wang, S. Muhammad, Y. Huang and J. He, *Nanoscale*, 2012, **4**, 2678.
